# Supplementary material
Source: Research Square preprint supplement (doi:10.21203/rs.3.rs-8958130/v1)
Supplement: Supplementary file 1 [file 7e09b77e45a7afbc1092cc3d.docx]

Fig S1. FTIR of olive oil

Fig S2. FTIR of Sulfur olive oil

Fig S3. FTIR of Sulfur elements

Table S1 saponification of **% SNP-nanoparticles metabolites and olive oils**

| **Peak**  **No.** | **RT** | **Name** | **% SNP-nanoparticles metabolites** | **% Olive Oil** |
| --- | --- | --- | --- | --- |
| 1 | 29.382 | Palmitic acid | **24.33** | **13.85** |
| 2 | 30.526 | Palmitoleic acid | 0.93 | 0.91 |
| 3 | 32.157 | Margaric acid | 0.07 | 0.07 |
| 4 | 34.97 | Stearic acid | 4.53 | 2.9 |
| 5 | 35.88 | Oleic acid | **63.17** | **70.7** |
| 6 | 37.488 | Linoleic acid | 5.09 | 10.04 |
| 7 | 39.583 | Linolenic acid | 0.39 | 0.68 |
| 8 | 40.123 | Arachidic acid | 0.99 | 0.46 |
| 9 | 40.844 | *cis*-11-Eicosenoic acid | 0.23 | 0.24 |
| 10 | 42.612 | Heneicosanoic acid | 0.02 | 0 |
| 11 | 45.03 | Behenic acid | 0.2 | 0.12 |
| 12 | 47.367 | Tricosanoic acid | 0.05 | 0.02 |

Table S2 saponification of **% SNP-nanoparticles metabolites and olive oils**

| **Peak No** | **RT** | **Name** | **Formula** | **% SNP-nanoparticles metabolites** | **% Olive Oil** |
| --- | --- | --- | --- | --- | --- |
|  | 12.173 | 5-Methyl-1-hexyn-3-ol | C7H12O | - | 0.48 |
| 1 | 26.008 | Phytol | C23H48O | 0.67 | - |
| 3 | 27.04 | 5-Tridecene, (Z) | C13H26 | - | 0.3 |
| 2 | 28.322 | 2-Methyl-6-tert-butylphenol | C14H24O | 0.44 | - |
| 3 | 28.831 | Stigmasterol | C32H56O | 0.41 | - |
| 4 | 29.423 | 1-Monopalmitin | C25H54O4 | 1.26 | 0.78 |
| 5 | 30.47 | Tetracosan-1-ol | C27H58O | 0.41 | - |
| 6 | 30.834 | Glycerol monostearate | C27H58O4 | 1.6 | 0.87 |
| 7 | 31.024 | Squalene | C30H50 | **73.02** | **81.04** |
| 8 | 31.805 | 1-Hexacosanol | C29H62O | 0.66 | 2.67 |
| 9 | 31.98 | Longipinene epoxide | C15H24O | 0.34 | 1.77 |
| 9 | 32.116 | cis-Z-α-Bisabolene epoxide | C15H24O | - | 0.52 |
| 10 | 33.08 | α-Tocopherol | C32H58O2 | 1.74 | 0.88 |
| 11 | 34.287 | β-Sitosterol | C32H58O | **13.78** | **3.25** |
| 12 | 34.363 | cis-5,8,11,14,17-Eicosapentaenoic acid | C20H30O2 |  | 0.96 |
| 13 | 34.37 | 4-Methylcholesta-8,24-dien-3-ol | C28H46O | 0.92 | - |
| 14 | 34.621 | Ergosterol | C28H44O | 3.96 | 3.31 |
| 16 | 35.228 | cis-Retinal | C20H28O | **0.57** | **0.92** |
| 17 | 35.759 | Ethyl α-(p-tolylsulfonyl)acetate | C11H14O4S | **0.23** | **-** |
